# Supplementary material for: VFFVA: dynamic load balancing enables large-scale flux variability analysis
Source: Springer Nature journal article supplement (doi:10.1186/s12859-020-03711-2), 2020-09-29
Supplement: 12859_2020_3711_MOESM1_ESM.pdf [file 12859_2020_3711_MOESM1_ESM.pdf]

Supplementary material to VFFVA: dynamic load  
balancing enables large-scale flux variability analysis

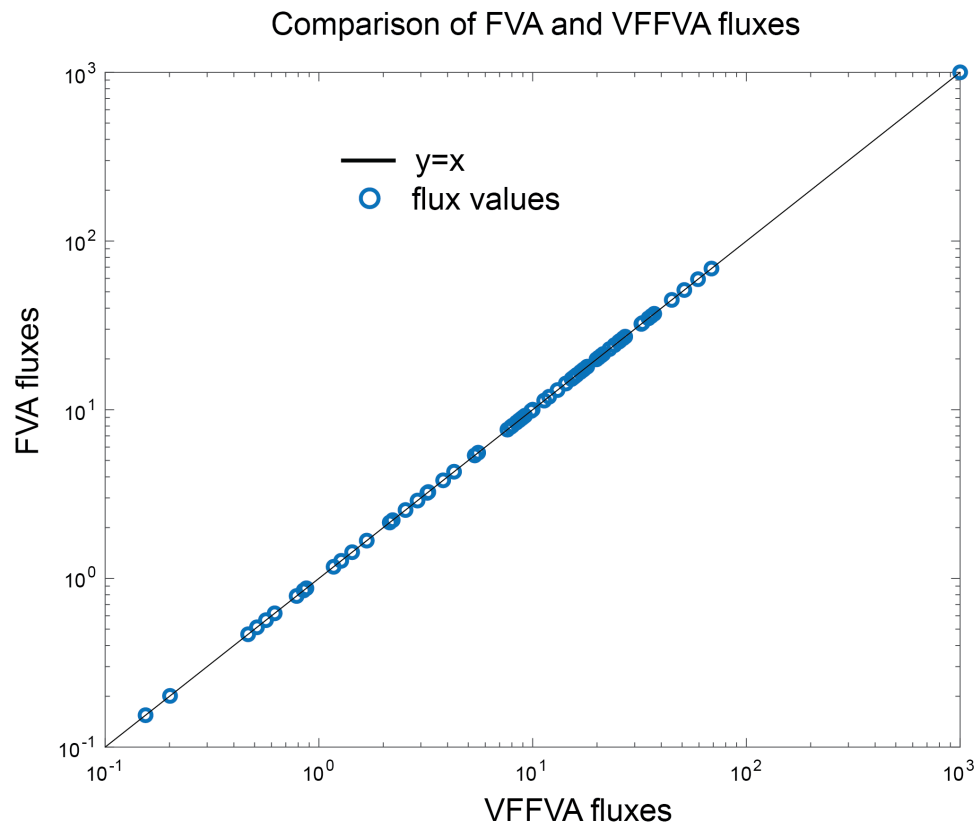

Figure S1: Comparison of VFFVA and FVA flux results in double precision using Ecoli\_core metabolic model. The largest difference between the flux values is equal to  $4.9314 * 10^{-7}$ .

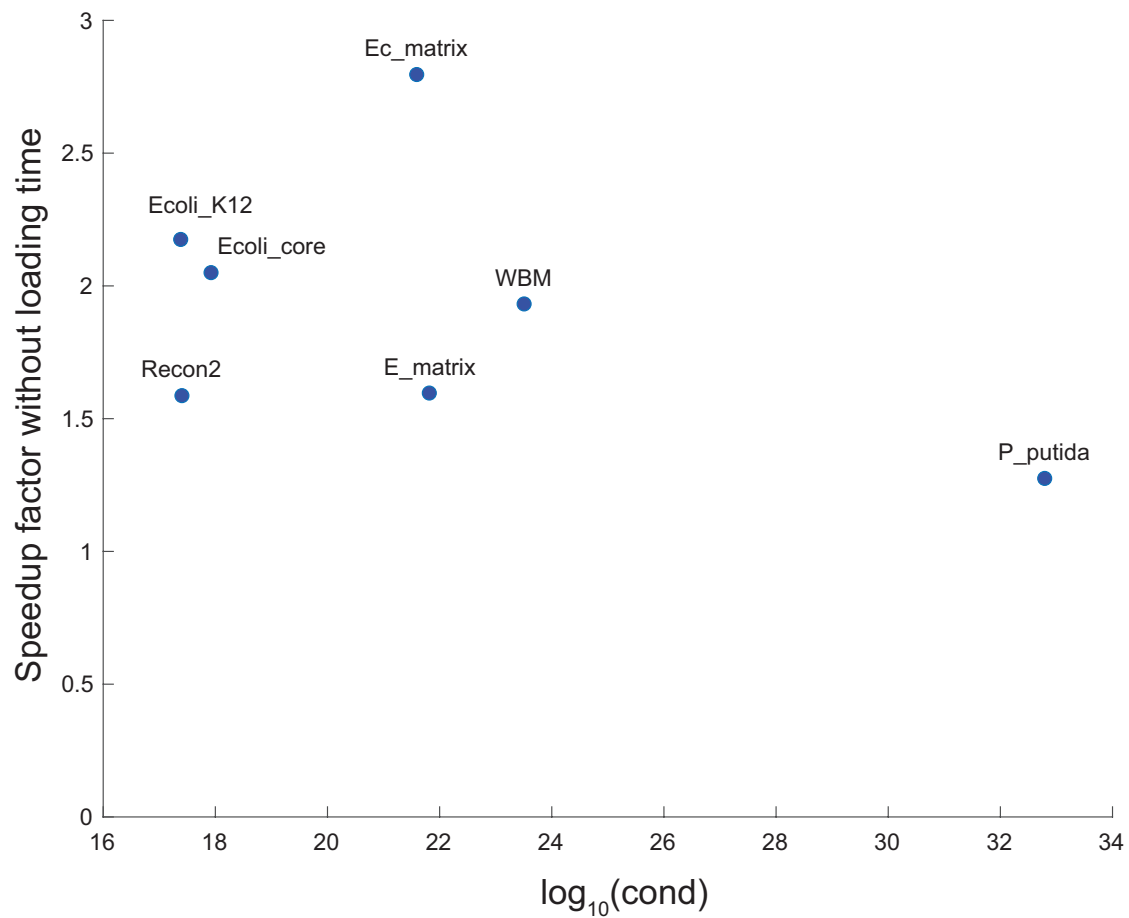

Figure S2: Absence of the effect of model complexity on VFFVA speedup over FFVA. The speedup of VFFVA over FFVA using 16 cores is represented as a function of model complexity expressed as the  $\log_{10}$  of the condition number of the stoichiometric matrix  $S$  of the selected models. Only the fraction of speedup that is due to dynamic load balancing, i.e., excluding loading time, is considered in this analysis.  $r = -0.45$ ,  $p$ -value = 0.3.
